# Supplementary material for: Preparation of a Highly Porous Carbon Material Based on Quinoa Husk and Its Application for Removal of Dyes by Adsorption
Source: MDPI journal article supplement (doi:10.3390/ma11081407), 2018-08-11
Supplement: s1 [file s1]

# Preparation of a Highly Porous Carbon Material Based on Quinoa Husk and Its Application for Removal of Dyes BY Adsorption

Siji Chen, Shanshan Tang, Yang Sun, Gang Wang, Huan Chen, Xiaoxiao Yu, Yingjie Su, Guang Chen\*

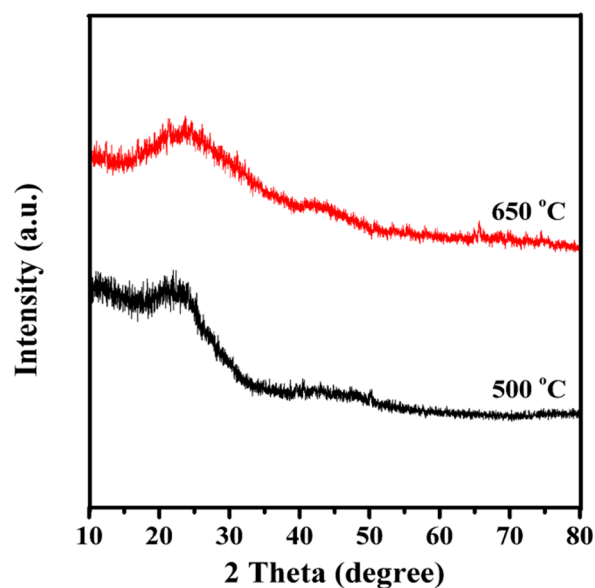

Figure S1. XRD of C-QH at different carbonization temperatures.

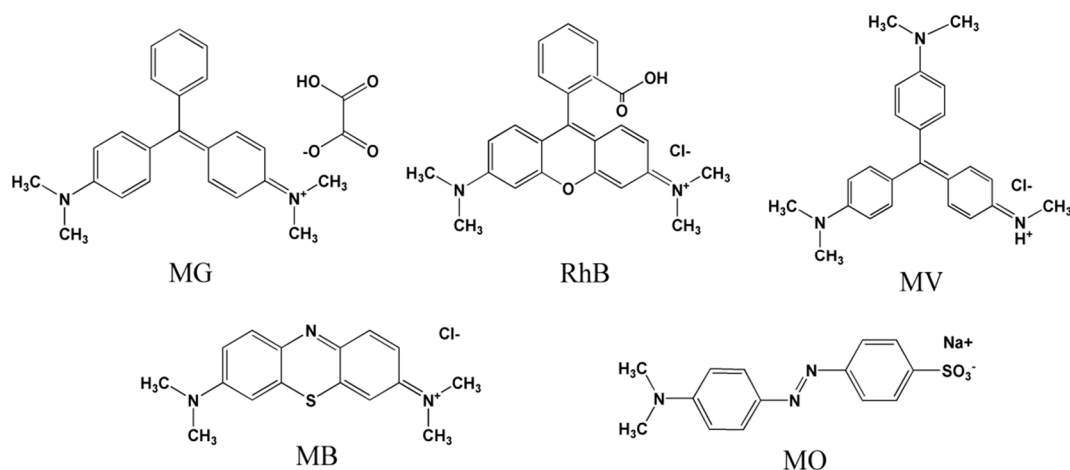

Figure S2. The structures of malachite green (MG), rhodamine B (RhB), methyl violet (MV), methylene blue (MB), and methyl orange (MO).

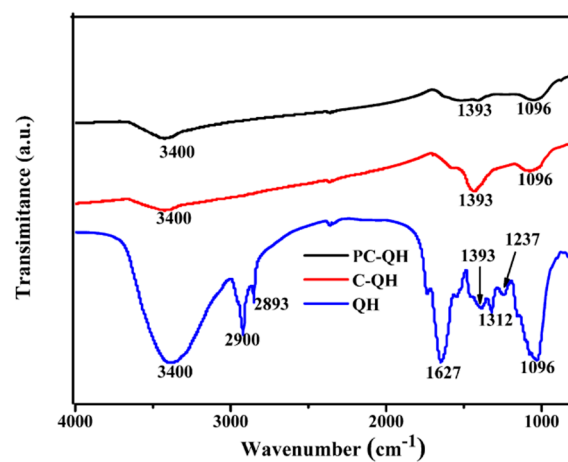

Figure S3. FT-IR spectra of QH, C-QH, and PC-QH.

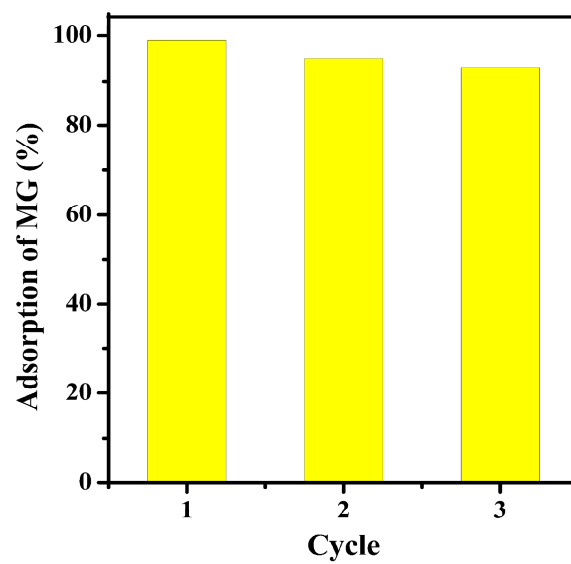

Figure S4. The reusability of PC-QH (pH: 7;  $C_0$ : 100  $\text{mg g}^{-1}$ ;  $V$ : 100 mL).

**Table S1.** Comparison of the adsorption capacity of PC-QH to MG with other adsorbents.

| Dye | Adsorbents                                                                                             | q <sub>m</sub> (mg g <sup>-1</sup> ) | Refs. |
|-----|--------------------------------------------------------------------------------------------------------|--------------------------------------|-------|
| MG  | Cellulose                                                                                              | 2.42                                 | [S1]  |
|     | Hen feathers                                                                                           | 2.82                                 | [S2]  |
|     | Neem sawdust                                                                                           | 4.35                                 | [S3]  |
|     | Sugarcane dust                                                                                         | 4.88                                 | [S4]  |
|     | Novel chitosan ionic liquid beads                                                                      | 8.07                                 | [S5]  |
|     | Arundo donax root carbon                                                                               | 8.69                                 | [S6]  |
|     | Ricinus communis based activated carbon                                                                | 27.78                                | [S7]  |
|     | Carbonized pomegranate peel                                                                            | 31.45                                | [S8]  |
|     | Activated carbon prepared from Rubber wood sawdust                                                     | 36.45                                | [S9]  |
|     | Borassus aethiopum flower biomass based activated carbon                                               | 48.48                                | [S10] |
|     | Forestry waste mixture                                                                                 | 52.61                                | [S11] |
|     | Natural Carica papaya wood                                                                             | 52.63                                | [S12] |
|     | Activated carbon derived from rice husks                                                               | 57.14                                | [S13] |
|     | Rattan sawdust                                                                                         | 62.71                                | [S14] |
|     | Rice husk bio-char                                                                                     | 67.60                                | [S15] |
|     | Rice husk                                                                                              | 76.92                                | [S16] |
|     | Adsorbent prepared from maize cob powder                                                               | 80.64                                | [S17] |
|     | Bivalve shell-treated Zea mays L. (maize) husk leaf                                                    | 81.50                                | [S18] |
|     | Beech sawdust                                                                                          | 83.21                                | [S19] |
|     | Walnut shell                                                                                           | 90.80                                | [S20] |
|     | Rice bran-based composites                                                                             | 93.68                                | [S21] |
|     | Oak acorn peel                                                                                         | 111.85                               | [S22] |
|     | Modified sphagnum peat moss                                                                            | 121.95                               | [S23] |
|     | Rice straw-derived char                                                                                | 148.74                               | [S24] |
|     | Oil palm trunk fibre                                                                                   | 149.35                               | [S25] |
|     | Chitosan                                                                                               | 166.00                               | [S26] |
|     | Activated carbon prepared from almond gum                                                              | 196.07                               | [S27] |
|     | Jute fiber based carbon                                                                                | 196.08                               | [S28] |
|     | Raw corn straw (RCS)                                                                                   | 200.00                               | [S29] |
|     | Ultrasound-assisted modified corn straw (MCS)                                                          | 210.00                               | [S29] |
|     | CO <sub>2</sub> -activated porous carbon derived from cattail biomass                                  | 210.18                               | [S30] |
|     | Cellulose nanofibril aerogels                                                                          | 212.70                               | [S31] |
|     | Carbon aerogels                                                                                        | 238.20                               | [S32] |
|     | Activated carbon produced from spent tea leaves                                                        | 256.40                               | [S33] |
|     | Activated carbon prepared from bamboo                                                                  | 263.58                               | [S34] |
|     | Covalently functionalized Fe <sub>3</sub> O <sub>4</sub> @SiO <sub>2</sub> -graphene oxides core-shell | 265.87                               | [S35] |
|     | Fabrication of starch-graft-poly(acrylamide)/grapheneoxide/hydroxyapatite                              | 297.00                               | [S36] |
|     | Tetraethylenepentamine-functionalized Rosa canina-L fruits activated carbon                            | 333.30                               | [S37] |
|     | Biodegradable adsorbent based on amylopectin and poly                                                  | 352.11                               | [S38] |
|     | Cellulose modified with maleic                                                                         | 370.00                               | [S39] |

|                                                              |         |           |
|--------------------------------------------------------------|---------|-----------|
| Reduction of graphene oxide                                  | 416.70  | [S40]     |
| Reduced graphene oxide                                       | 476.20  | [S41]     |
| Magnetic graphene oxide                                      | 714.30  | [S42]     |
| TEMPO-oxidized cellulose beads                               | 740.00  | [S43]     |
| Fibrous cellulose sulfate prepared from medical cotton waste | 960.00  | [S44]     |
| Macroalgae-derived biochar (MDBC800)                         | 5306.20 | [S45]     |
| PC-QH                                                        | 1365.10 | This work |

## References

- S1 Sekhar, C.P.; Kalidhasan, S.; Rajesh, V.; Rajesh, N. Bio-polymer adsorbent for the removal of malachite green from aqueous solution. *Chemosphere* **2009**, *77*, 842-847.
- S2 Mittal, A. Adsorption kinetics of removal of a toxic dye, Malachite Green, from wastewater by using hen feathers. *J. Hazard. Mater.* **2006**, *113*, 196-202.
- S3 Khattri, S.D.; Singh, M.K. Removal of malachite green from dye wastewater using neem sawdust by adsorption. *J. Hazard. Mater.* **2009**, *167*, 1089-1094.
- S4 Khattri, S.D.; Singh, M.K. Colour Removal From Dye Wastewater Using Sugar Cane Dust as an Adsorbent. *Adsorpt. Sci. Technol.* **1999**, *17*, 269-282.
- S5 Naseeruteena, F.; Hamida, N.S.A.; Suaha, F.B.M.; Ngaha, W.S.W.; Mehamod, F.S. Adsorption of malachite green from aqueous solution by using novel chitosan ionic liquid beads. *Int. J. Biol. Macromol.* **2017**, *107*, 1270-1277.
- S6 Zhang, J.; Li, Y.; Zhang, C.; Jing, Y. Adsorption of malachite green from aqueous solution onto carbon prepared from *Arundo donax* root. *J. Hazard. Mater.* **2008**, *150*, 774-782.
- S7 Santhi, T.; Manonmani, S.; Smitha, T. Removal of malachite green from aqueous solution by activated carbon prepared from the epicarp of *Ricinus communis* by adsorption. *J. Hazard. Mater.* **2010**, *179*, 178-186.
- S8 Gündüz, F.; Bayrak, B. Biosorption of malachite green from an aqueous solution using pomegranate peel: Equilibrium modelling, kinetic and thermodynamic studies. *J. Mol. Liq.* **2017**, *243*, 790-798.
- S9 Kumar, K.V.; Sivanesan, S. Isotherms for Malachite Green onto rubber wood (*Hevea brasiliensis*) sawdust: Comparison of linear and non-linear methods. *Dyes Pigments.* **2007**, *72*, 124-129.
- S10 Nethaji, S.; Sivasamy, A.; Thennarasu, G. Saravanan, S. Adsorption of Malachite Green dye onto activated carbon derived from *Borassus aethiopum* flower biomass. *J. Hazard. Mater.* **2010**, *181*, 271-280.
- S11 Deniz, F.; Kepekci, R.A. Bioremoval of Malachite green from water sample by forestry waste mixture as potential biosorbent. *Microchem. J.* **2017**, *132*, 172-178.
- S12 Rangabhashiyam, S.; Sujata, L.; Balasubramanian, P. Biosorption characteristics of methylene blue and malachite green from simulated wastewater onto *Carica papaya* wood biosorbent. *Surfaces and Interfaces* **2018**, *10*, 197-215.
- S13 Rahman, I.A.; Saad, B.; Shaidan, S.; Sya Rizal, E.S. Adsorption characteristics of malachite green on activated carbon derived from rice husks produced by chemical-thermal process. *Bioresource Technol.* **2005**, *96*, 1578-1583.
- S14 Hameed, B.H.; El-Khaiary, M.I. Batch removal of malachite green from aqueous solutions by adsorption on oil palm trunk fibre: equilibrium isotherms and kinetic studies. *J. Hazard. Mater.* **2008**, *159*, 574-579.
- S15 Leng, L.; Yuan, X.; Zeng, G.; Shao, J.; Chen, X.; Wu, Z. Surface characterization of rice husk bio-char

- produced by liquefaction and application for cationic dye (Malachite green) adsorption. *Fuel* **2015**, 155, 77-85.
- S16 Rahman, I.A.; Saad, B.; Shaidan, S.; Rizal, E.S.S. Adsorption characteristics of malachite green on activated carbon derived from rice husks produced by chemical-thermal process. *Bioresource Technol.* **2005**, 96, 1578-1583.
- S17 Sonawane, G.H.; Shrivastava, V.S. Kinetics of decolourization of malachite green from aqueous medium by maize cob (Zea maize): an agricultural solid waste. *Desalination* **2009**, 247, 430-441.
- S18 Jalil, A.A.; Triwahyono, S.; Yaakob, M.R.; Azmi, Z.Z.A.; Sapawe, N.; Kamarudin, N.H.N. Utilization of bivalve shell-treated Zea mays L. (maize) husk leaf as a low-cost biosorbent for enhanced adsorption of malachite green. *Bioresource Technol.* **2012**, 120, 218-224.
- S19 Witek-Krowiak, A. Analysis of influence of process conditions on kinetics of malachite green biosorption onto beech sawdust. *Chem. Eng. J.* **2011**, 171, 976-985.
- S20 Dahri, M.K.; Kooh, M.R.R.; Lim, L.B.L. Water remediation using low cost adsorbent walnut shell for removal of malachite green: Equilibrium, kinetics, thermodynamic and regeneration studies. *J. Environ. Chem. Eng.* **2014**, 2, 1434-1444.
- S21 Bhatti, H.N.; Jabeen, A.; Iqbal, M.; Noreen, S.; Naseem, Z. Adsorptive behavior of rice bran-based composites for malachite green dye: Isotherm, kinetic and thermodynamic studies. *J. Mol. Liq.* **2017**, 237, 322-333.
- S22 Kuppusamy, S.; Venkateswarlu, K.; Thavamani, P.; Bok Lee, Y.; Naidu, R.; Megharaj, M. Quercus robur acorn peel as a novel coagulating adsorbent for cationic dye removal from aquatic ecosystems. *Ecol. Eng.* **2017**, 101, 3-8.
- S23 Hemmati, F.; Norouzbeigi, R.; Sarbisheh, F.; Shayesteh, H. Malachite green removal using modified sphagnum peat moss as a low-cost biosorbent: Kinetic, equilibrium and thermodynamic studies. *J. Taiwan Inst. Chem. E.* **2015**, 58, 482-489.
- S24 Hameed, B.H.; El-Khaiary, M.I. Kinetics and equilibrium studies of malachite green adsorption on rice straw-derived char. *J. Hazard. Mater.* **2008**, 153, 701-708.
- S25 Hameed, B.H.; El-Khaiary, M.I. Batch removal of malachite green from aqueous solutions by adsorption on oil palm trunk fibre: equilibrium isotherms and kinetic studies. *J. Hazard. Mater.* **2008**, 154, 237-244.
- S26 Subramani, S.E.; Thinakaran, N. Isotherm, kinetic and thermodynamic studies on the adsorption behavior of textile dyes onto chitosan. *Process Saf. Environ.* **2016**, 106, 1-10.
- S27 Bouaziz, F.; Koubaa, M.; Kallel, F.; Ghorbel, R.E.; Chaabouni, S.E. Adsorptive removal of malachite green from aqueous solutions by almond gum: Kinetic study and equilibrium isotherms. *Int. J. Biol. Macromol.* **2017**, 105, 56-65.
- S28 Porkodi, K.; Kumar, K.V. Equilibrium, kinetics and mechanism modeling and simulation of basic and acid dyes sorption onto jute fiber carbon: Eosin yellow, malachite green and crystal violet single component systems. *J. Hazard. Mater.* **2007**, 143, 311-327.
- S29 Lima, D.R.; Klein, L.; Dotto, G.L. Application of ultrasound modified corn straw as adsorbent for malachite green removal from synthetic and real effluents. *Environ. Sci. Pollut. Res.* **2017**, 24, 1-12.
- S30 Yu, M.; Han, Y.; Li, J.; Wang, L. CO<sub>2</sub>-activated porous carbon derived from cattail biomass for removal of malachite green dye and application as supercapacitors. *Chem. Eng. J.* **2017**, 317, 493-502.
- S31 Jiang, F.; Dinh, D.M.; Hsieh, Y.L. Adsorption and desorption of cationic malachite green dye on cellulose nanofibril aerogels. *Carbohydr Polym.* **2017**, 173, 286-294.
- S32 Yu, M.; Han, Y.; Li, J.; Wang, L. Magnetic N-doped carbon aerogel from sodium carboxymethyl

- cellulose/collagen composite aerogel for dye adsorption and electrochemical supercapacitor. *Int. J. Biol. Macromol.* **2018**, 115, 185-193.
- S33 Akar, E.; Altinisik, A.; Seki, Y. Using of activated carbon produced from spent tea leaves for the removal of malachite green from aqueous solution. *Ecol. Eng.* **2013**, 52, 19-27.
- S34 Hameed, B.H.; El-Khaiary, M.I. Equilibrium, kinetics and mechanism of malachite green adsorption on activated carbon prepared from bamboo by  $K_2CO_3$  activation and subsequent gasification with  $CO_2$ . *J. Hazard. Mater.* **2008**, 157, 344-351.
- S35 Zhang, J.; Liu, M.; Liu, Z.; Yang, T.; He, Q.; Yang, K.; Wang, H. Studies of malachite green adsorption on covalently functionalized  $Fe_3O_4@SiO_2$ -graphene oxides core-shell magnetic microspheres. *J. Sol-Gel Sci. Technol.* **2017**, 82, 424-431.
- S36 Hosseinzadeh, H.; Ramin, S. Fabrication of starch-graft-poly (acrylamide)/graphene oxide/hydroxyapatite nanocomposite hydrogel adsorbent for removal of malachite green dye from aqueous solution. *Int. J. Biol. Macromol.* **2018**, 106, 101-115.
- S37 Ghasemi, M.; Mashhadi, S.; Asif, M.; Tyagi, I.; Agarwal, S.; Gupta, V.K. Microwave-assisted synthesis of tetraethylenepentamine functionalized activated carbon with high adsorption capacity for Malachite green dye. *J. Mol. Liq.* **2016**, 213, 317-325.
- S38 Sarkar, A.K.; Pal, A.; Ghorai, S.; Mandre, N.R.; Pal, S. Efficient removal of malachite green dye using biodegradable graft copolymer derived from amylopectin and poly(acrylic acid). *Carbohydr. Polym.* **2014**, 111, 108-115.
- S39 Zhou, Y.; Min, Y.; Qiao, H.; Huang, Q.; Wang, E.; Ma, T. Improved removal of malachite green from aqueous solution using chemically modified cellulose by anhydride. *Int. J. Biol. Macromol.* **2015**, 74, 271-277.
- S40 Sykam, N.; Madhavi, V.; Rao, G.M. Rapid and efficient green reduction of graphene oxide for outstanding supercapacitors and dye adsorption applications. *J. Environ. Chem. Eng.* **2018**, 6, 3223-3232.
- S41 Gupta, K.; Khatri, O.P. Reduced graphene oxide as an effective adsorbent for removal of malachite green dye: Plausible adsorption pathways. *J. Colloid Interf. Sci.* **2017**, 501, 11-21.
- S42 Yakout, A.A. Shaker, M.A. Dodecyl sulphate functionalized magnetic graphene oxide nanosorbent for the investigation of fast and efficient removal of aqueous malachite green. *J. Taiwan Inst. Chem. E.* **2016**, 63, 81-88.
- S43 Lin, F.; You, Y.; Yang, X.; Jiang, X.; Lu, Q.; Wang, T.; Huang, B.; Lu, B. Microwave-assisted facile synthesis of TEMPO-oxidized cellulose beads with high adsorption capacity for organic dyes. *Cellulose* **2017**, 24, 5025-5040.
- S44 Baghdadi, M.; Soltani, B.A.; Nourani, M. Malachite green removal from aqueous solutions using fibrous cellulose sulfate prepared from medical cotton waste: Comprehensive batch and column studies. *J. Ind. Eng. Chem.* **2017**, 55, 128-139.
- S45 Chen, Y.; Lin, Y.C.; Ho, S.H.; Zhou, Y.; Ren, N. Highly efficient adsorption of dyes by biochar derived from pigments-extracted macroalgae pyrolyzed at different temperature. *Bioresource Technol.* **2018**, 259, 104-110.
